# Supplementary material for: The role of ethylene carbonate (EC) and tetramethylene sulfone (SL) in the dissolution of transition metals from lithium-ion cathodes
Source: Royal Society of Chemistry journal article supplement (doi:10.1039/d3ra02535g), 2023-01-01

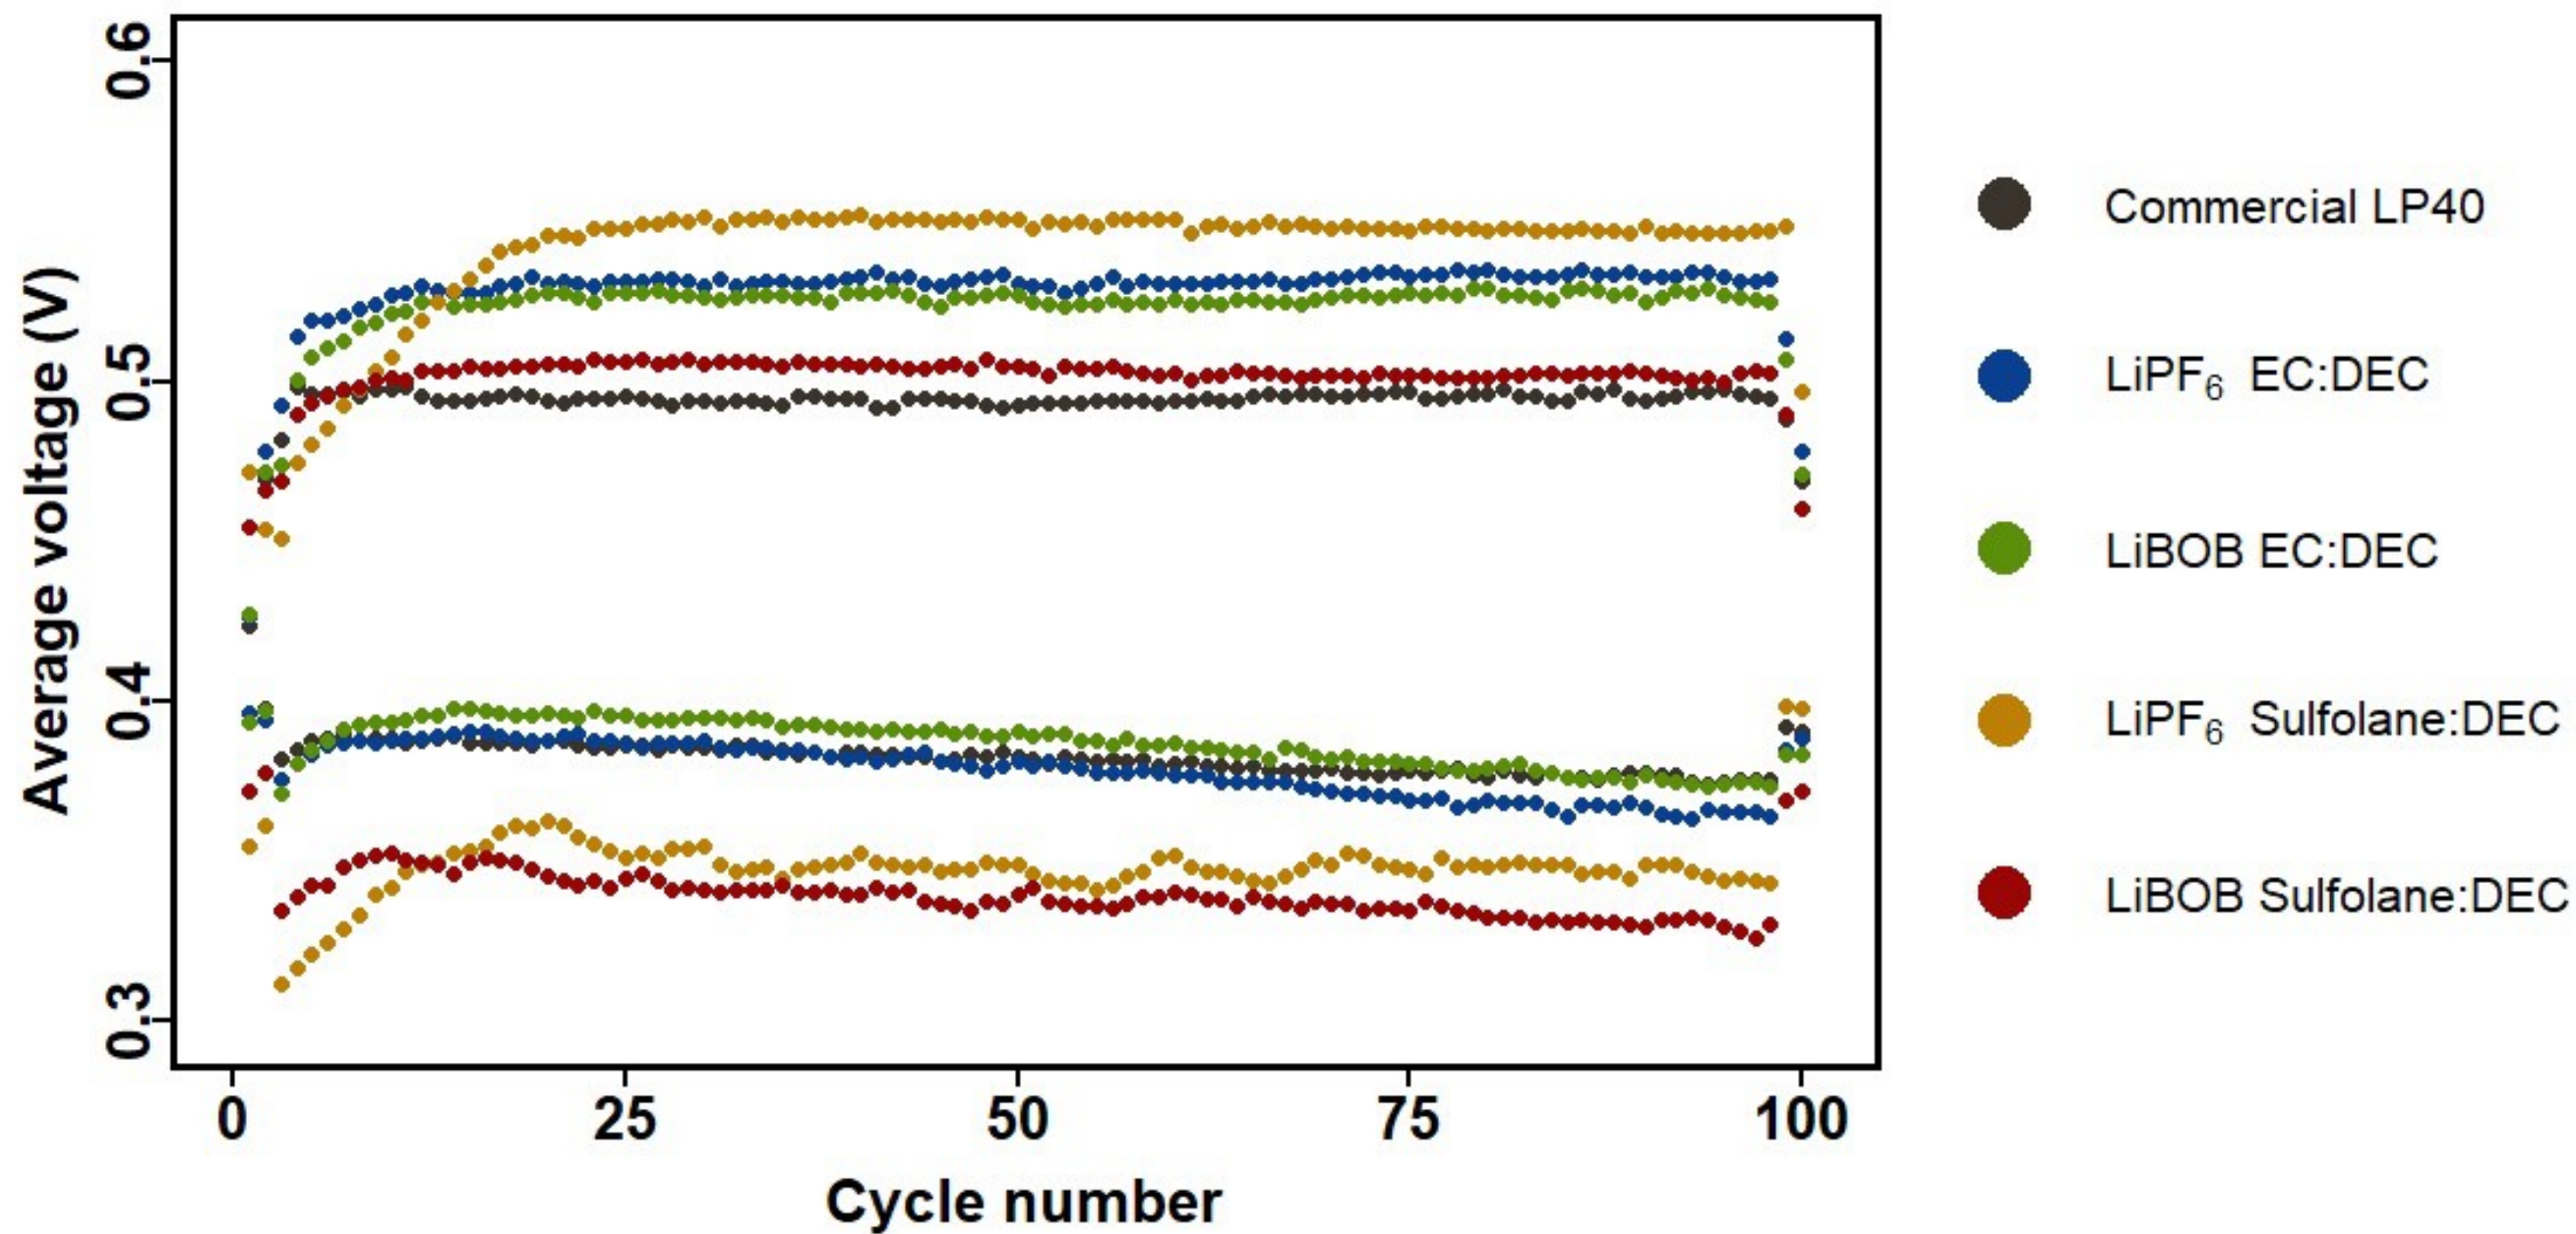

Supplement: d3ra02535g6.pdf [file d3ra02535g6.pdf]
