# Supplementary material for: The role of ethylene carbonate (EC) and tetramethylene sulfone (SL) in the dissolution of transition metals from lithium-ion cathodes
Source: Royal Society of Chemistry journal article supplement (doi:10.1039/d3ra02535g), 2023-01-01
Supplement: d3ra02535g7.pdf [file d3ra02535g7.pdf]

## Supplementary informaion

# The Role of EC and sulfolane on the dissolution of transition metals from Lithium-Ion Cathodes

Yonas Tesfamhret<sup>\*a</sup>, Haidong Liu<sup>a</sup>, Erik J. Berg<sup>a</sup> and Reza Younesi<sup>a</sup>

<sup>a</sup>Department of Chemistry - Ångström Laboratory, Uppsala University, Box 538, SE-75121 Uppsala, Sweden

\* [yonas.tesfamhret@kemi.uu.se](mailto:yonas.tesfamhret@kemi.uu.se)

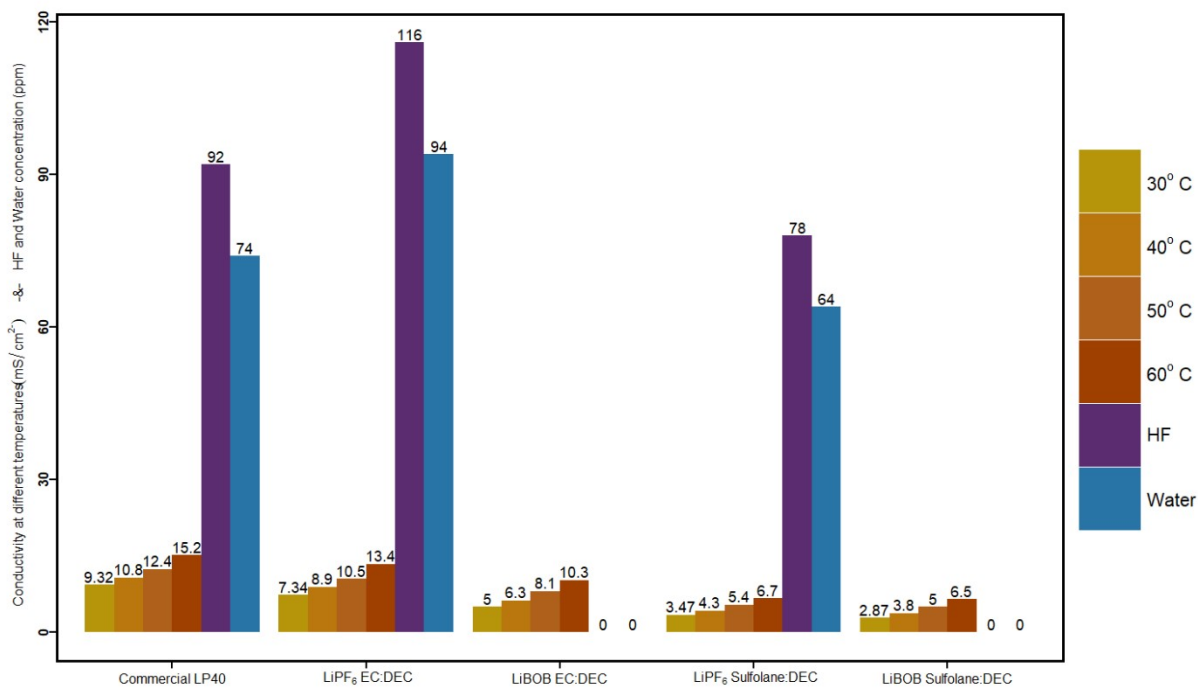

Figure S 1. The ionic conductivity, H<sub>2</sub>O and HF concentration of LP40 and prepared electrolytes of 0.7 M LiBOB|SL|DEC, 0.7 M LiPF<sub>6</sub>|SL|DEC, 0.7 M LiPF<sub>6</sub>|EC|DEC and 0.7 M LiBOB|EC|DEC. Ionic conductivity is conducted at 30 °C, 40 °C, 50 °C and 60 °C.

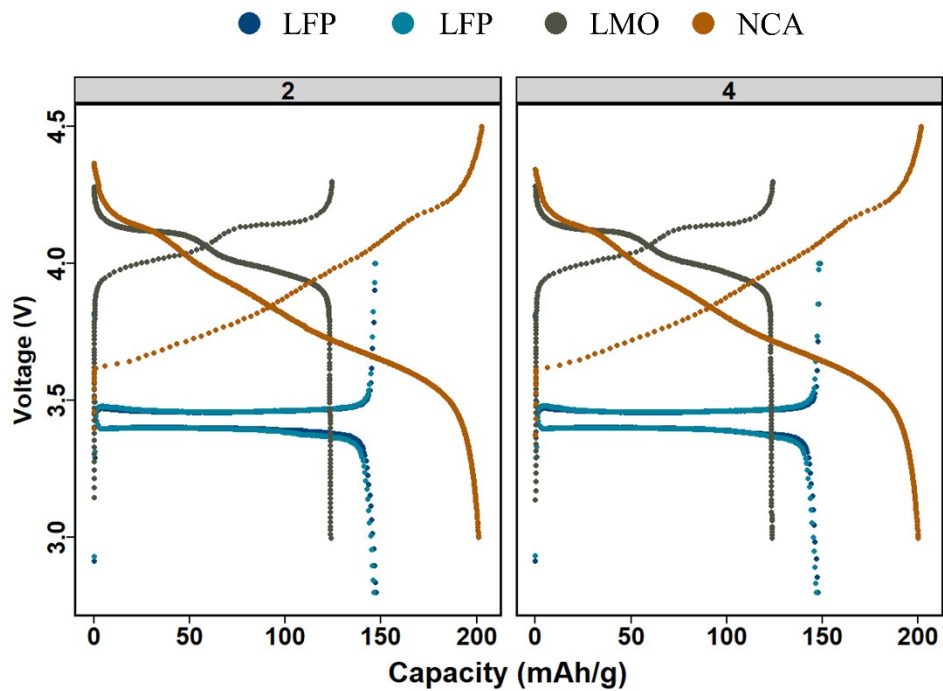

Figure S 2. Half-cell cycling of LFP, LMO and NCA (second and fourth cycle).

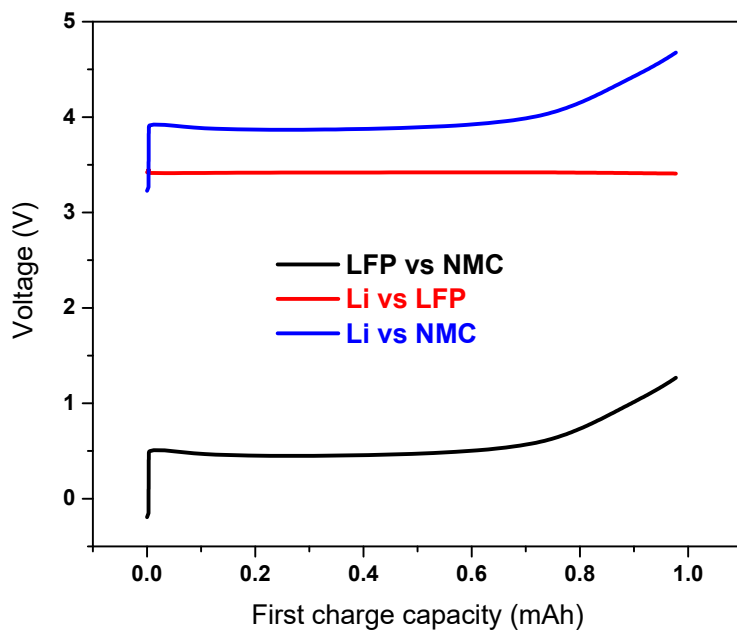

Figure S 3. First charge of a three-electrode cell cycling of LFP|Li|NCA.

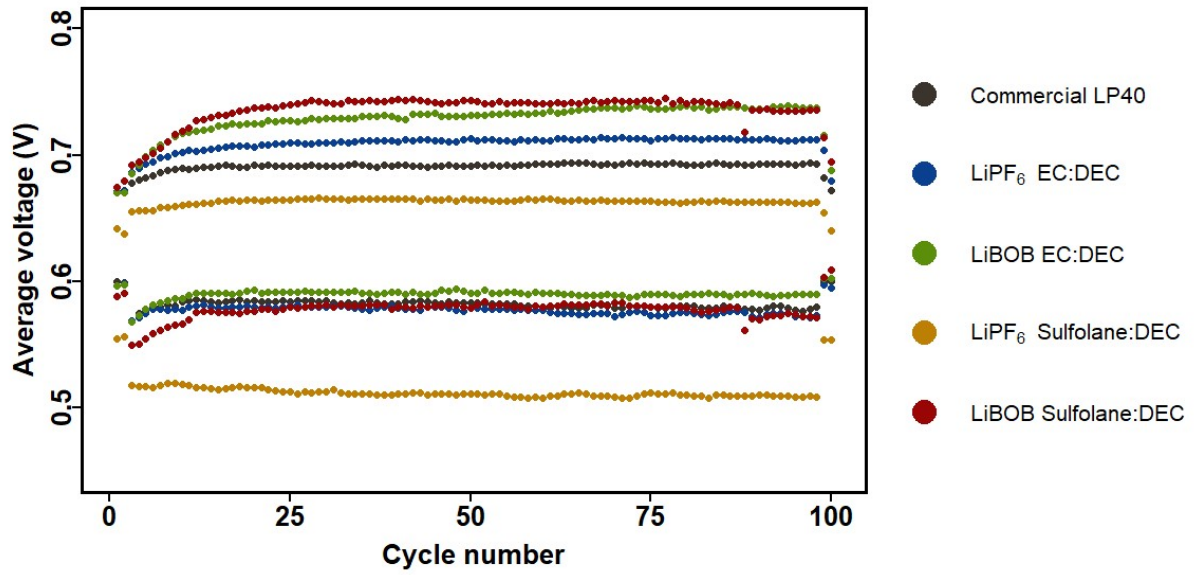

Figure S 4. Average voltage of LMO full-cells.

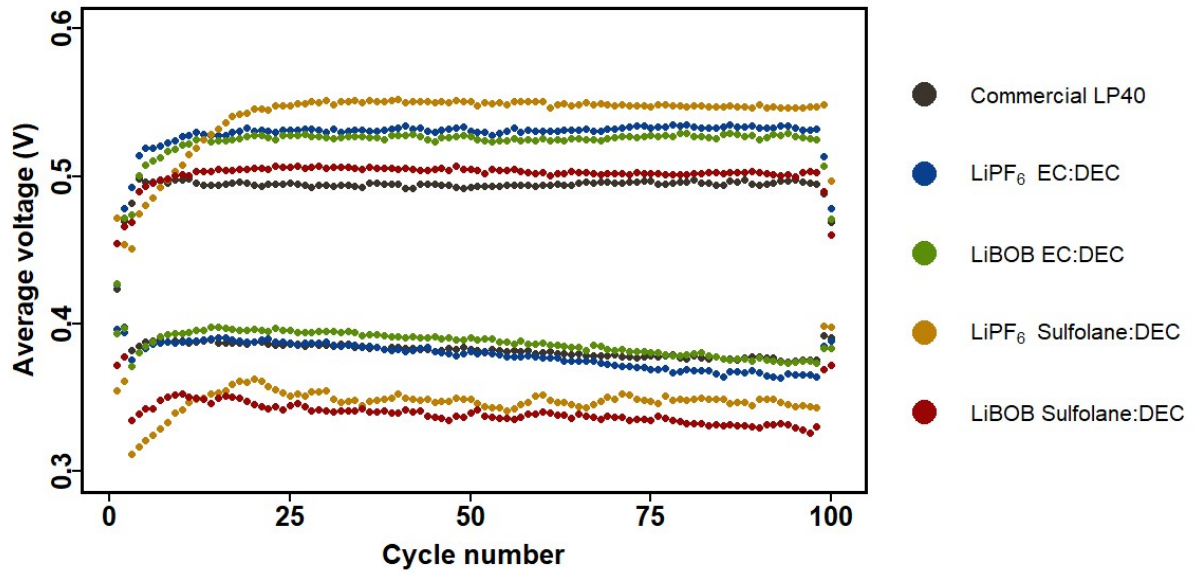

Figure S 5. Average voltage of NCA full-cells.

Table S 1. ICP-OES characterization of NCA powder show the composition of  $\text{Li}_{1.021}(\text{Ni}_{0.794}\text{Co}_{0.17}\text{Al}_{0.036})\text{O}_2$ .

|    | Sample Id                          | Acquisition Time    | Li 670,784<br>(mg/L) | Mn 257,610<br>(mg/L) | Co 228,616<br>(mg/L) | Ni 231,604<br>(mg/L) | Al 396,153<br>(mg/L) |
|----|------------------------------------|---------------------|----------------------|----------------------|----------------------|----------------------|----------------------|
| 1  | For dilution, 10% HNO <sub>3</sub> | 2021-12-20 16:08:34 | 0.000                | 0.000                | 0.000                | 0.000                | 0.000                |
| 2  | Reference, Multi 3 0.1 mg/L        | 2021-12-20 16:11:11 | 0.100                | 0.100                | 0.100                | 0.100                | 0.100                |
| 12 | NCA_powder                         | 2021-12-20 16:38:41 | 0.489                | 0.001                | 0.326                | 3.193                | 0.067                |
|    | <i>RSD</i>                         |                     | <i>0.9%</i>          | <i>1.4%</i>          | <i>2.2%</i>          | <i>3.4%</i>          | <i>2.4%</i>          |
